# Supplementary material for: Lidocaine Suppresses Viability and Migration of Human Breast Cancer Cells: TRPM7 as a Target for Some Breast Cancer Cell Lines
Source: MDPI journal article supplement (doi:10.3390/cancers13020234), 2021-01-10
Supplement: s1 [file s1]

## Supplementary Materials

### 1. TRPM7 Expression in Breast Cancer Cell Lines

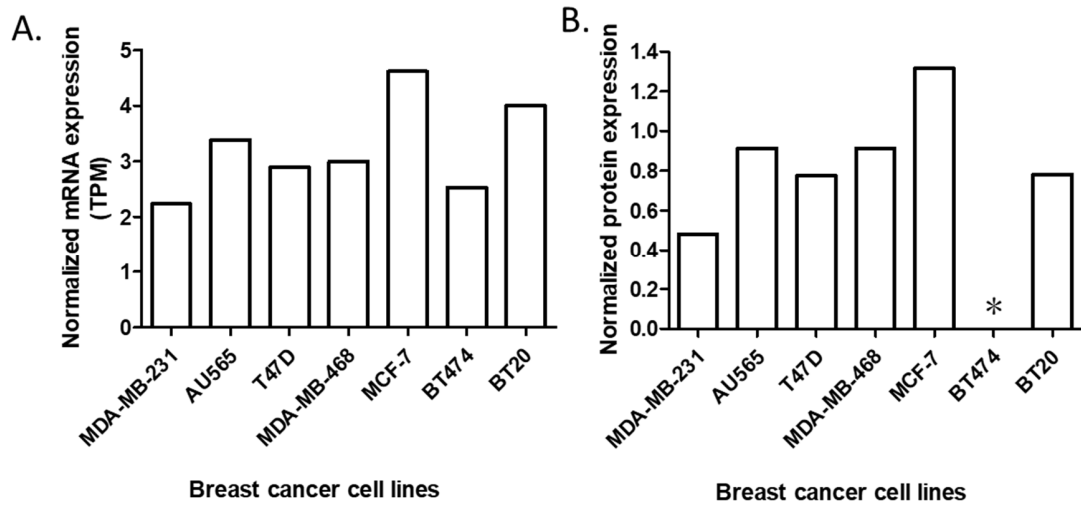

**Figure S1.** TRPM7 expression in breast cancer cell lines. **A.** The mRNA expression. The mRNA expression data (RNA seq) was downloaded and extracted from the Cancer Cell Line Encyclopedia (CCLE) [1]. **B.** The protein expression of TRPM7. The protein proteomics expression data was downloaded and extracted from the Quantitative Proteomics of the Cancer Cell Line Encyclopedia [2].

### 2. Additional Fluorescence Quench Data

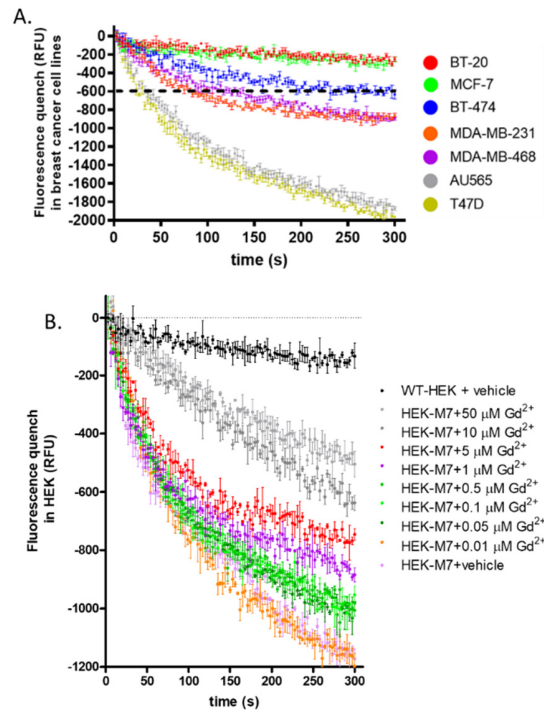

**Figure S2.** Fluorescence quench assay (n = 3). **A.** Fluorescence quench in Fura-2 loaded breast cancer cell lines (n = 3). The methods were described in the main text of the paper, n = 3. Cell lines with quench amounts larger than 600 relative fluorescence units (RFU) were used in the TRPM7 functional study. **B.** Effect of  $Gd^{2+}$  on TRPM7. WT-HEK was used as negative control.  $[Gd^{2+}] \geq 0.05 \mu M$  concentration-dependently decreased the influx of  $Mn^{2+}$  in HEK-M7.

3. Effect of TRM7 Knockout on Migration of MDA-MB-231.

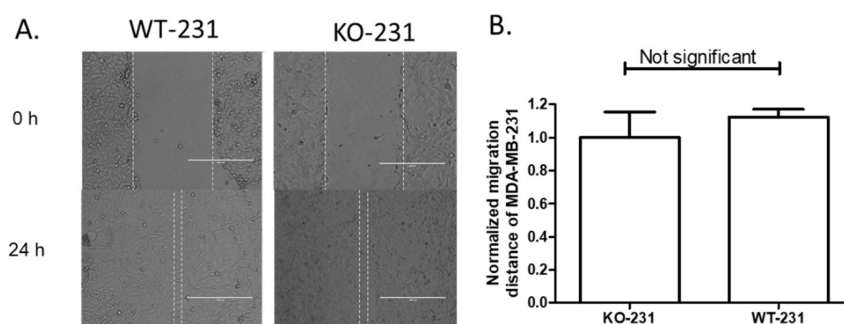

**Figure S3.** The effect of TRPM7 knockout on cell migration of breast cancer cell line MDA-MB-231. **A.** Representative image from wound healing assay. **B.** The data was normalized by the division of the average migration distance of KO-231. 24 hours after the creation of the wound, there was no significant difference in migration distance between KO-231 and WT-231 ( $p > 0.05$ ).

## References

1. Ghandi, M.; Huang, F.W.; Jané-Valbuena, J.; Kryukov, G.V.; Lo, C.C.; McDonald, E.R.; Barretina, J.; Gelfand, E.T.; Bielski, C.M.; Li, H.; et al. Next-generation characterization of the Cancer Cell Line Encyclopedia. *Nature* **2019**, *569*, 503-508, doi:10.1038/s41586-019-1186-3.
2. Nusinow, D.P.; Szpyt, J.; Ghandi, M.; Rose, C.M.; McDonald, E.R., 3rd; Kalocsay, M.; Jané-Valbuena, J.; Gelfand, E.; Schweppe, D.K.; Jedrychowski, M., et al. Quantitative Proteomics of the Cancer Cell Line Encyclopedia. *Cell* **2020**, *180*, 387-402.e316, doi:10.1016/j.cell.2019.12.023.
